# Supplementary material for: Molecular subtyping of nasopharyngeal carcinoma (NPC) and a microRNA-based prognostic model for distant metastasis
Source: PubMed Central journal article supplement (PMC5817810; doi:10.1186/s12929-018-0417-5), 2018-02-19

**a**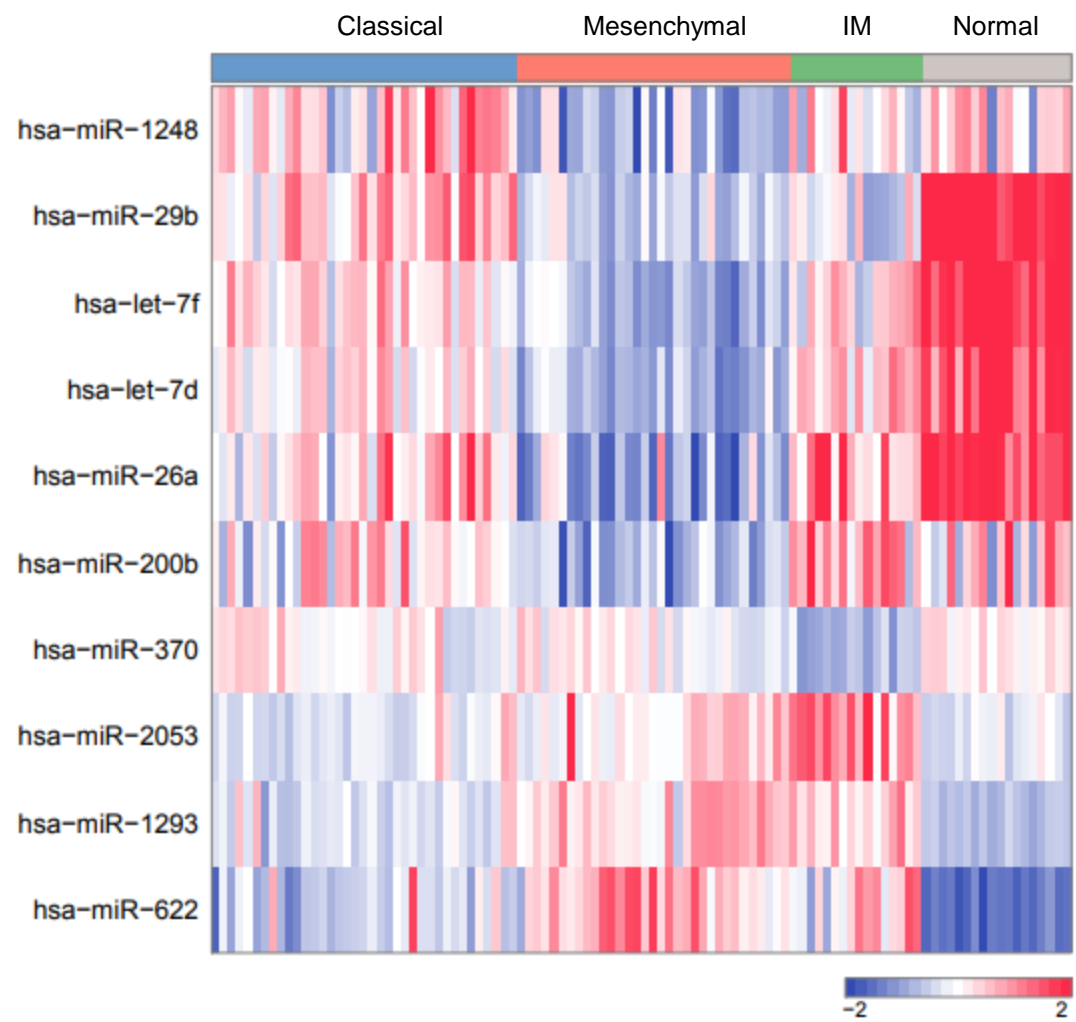**b**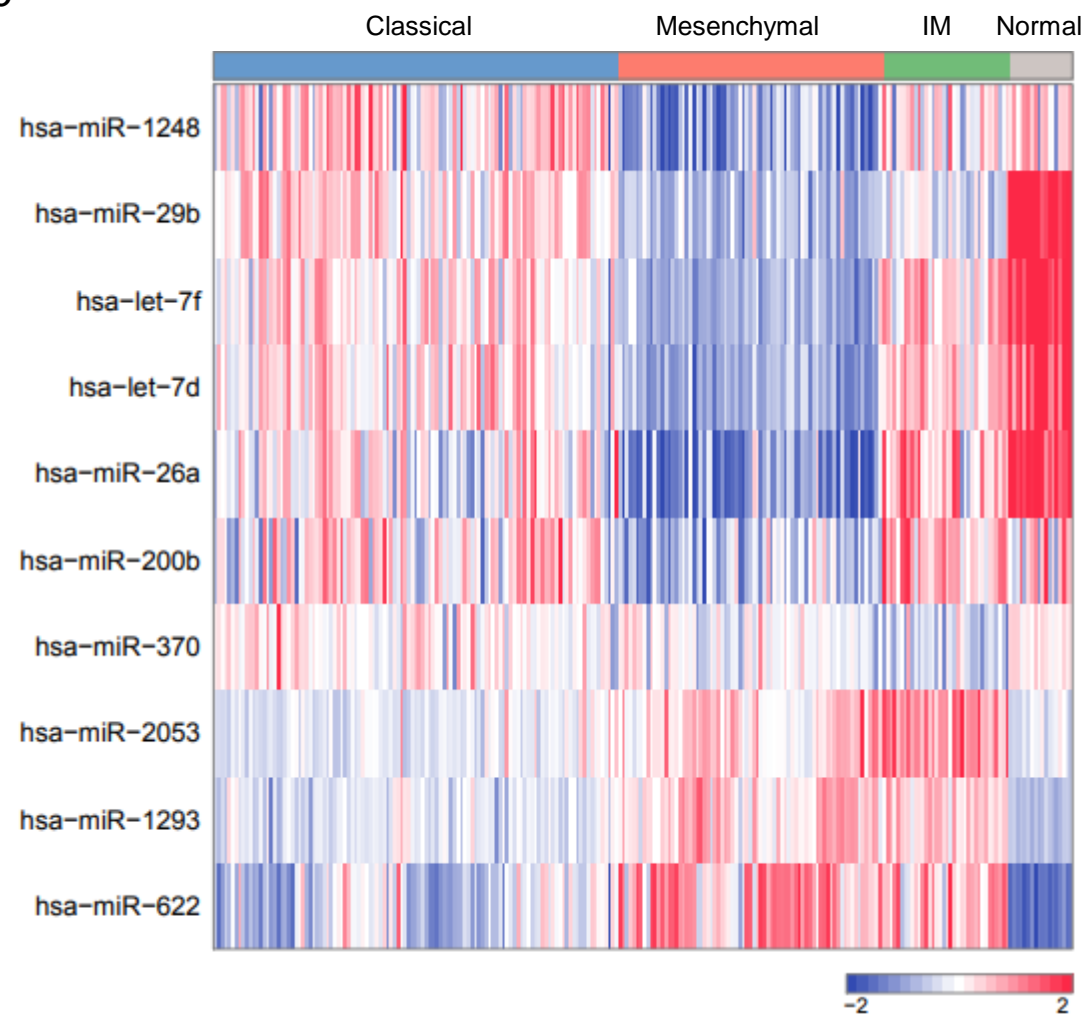

Supplement: 12929_2018_417_MOESM1_ESM.pdf [file 12929_2018_417_MOESM1_ESM.pdf]
